# Supplementary material
Source: publisher figshare collection journal article supplement (https://tandf.figshare.com/articles/dataset/_/963515)
Supplement: Supplementary file 2 [file 1]

Journal of Vertebrate Paleontology  
ONLINE SUPPLEMENTARY INFORMATION

A new early Miocene octodontoid rodent (Hystricognathi, Caviomorpha) from Patagonia  
(Argentina) and a reassessment of the early evolution of Octodontoidea

MICHELLE ARNAL,<sup>\*,1</sup> ALEJANDRO G. KRAMARZ,<sup>2</sup> M. GUIOMAR VUCETICH,<sup>1</sup> and E.  
CAROLINA VIEYTES<sup>3</sup>

<sup>1</sup>Departamento Paleontología de Vertebrados, Facultad de Ciencias Naturales y Museo, Paseo  
del Bosque s/n, 1900 La Plata, Argentina, [michoarnal@fcnym.unlp.edu.ar](mailto:michoarnal@fcnym.unlp.edu.ar);  
[vucetich@fcnym.unlp.edu.ar](mailto:vucetich@fcnym.unlp.edu.ar);

<sup>2</sup>Sección Paleontología de Vertebrados, Museo Argentino de Ciencias Naturales “Bernardino  
Rivadavia,” Av. Ángel Gallardo 470, C1405DJR Buenos Aires, Argentina,  
[agkramarz@macn.gov.ar](mailto:agkramarz@macn.gov.ar);

<sup>3</sup>Sección Mastozoología, División Zoología de Vertebrados, Facultad de Ciencias Naturales y  
Museo, Paseo del Bosque s/n, 1900 La Plata, Argentina, [cvieytes@fcnym.unlp.edu.ar](mailto:cvieytes@fcnym.unlp.edu.ar)

APPENDIX 3. Character-taxon matrix used for the phylogenetic analysis. The letters represent polymorphic scorings (i.e., A = states 0 and 1; B = states 1 and 2; C = states 0 and 2; D = states 1 and 3).

<matrix>

|                                      |  | 10         | 20         | 30         | 40          |
|--------------------------------------|--|------------|------------|------------|-------------|
| <i>Bugtimys zafarullahi</i>          |  | 00000?0031 | 1112001100 | 10-110-001 | 1120000300  |
| <i>Metaphiomys schaubi</i>           |  | 0000100001 | 01???????? | ???????001 | 211000011B  |
| <i>Phiomys andrewsi</i>              |  | 1000000??? | ??11000001 | 1101010000 | 0110000111  |
| <i>Garridomys curunuquem</i>         |  | 1121011??? | ??00111002 | 1111112001 | 110001-101  |
| <i>Dasyprocta azarae</i>             |  | 1121011012 | 2?0311120B | 1111112001 | 1120000D21  |
| <i>Eosteiromys homogenidens</i>      |  | 1110010??? | ??0311?001 | 0101112001 | 0001000100  |
| <i>Steiromys detentus</i>            |  | 1110010010 | ?103110001 | 1111112001 | 1001000100  |
| <i>Dudumus ruigomezi</i>             |  | 1110100020 | 01-----    | -----001   | 000A00A20A  |
| <i>Prospaniomys priscus</i>          |  | 1110110100 | 01-----    | -----001   | 010101-000  |
| <i>Protacaremys prior</i>            |  | 1110110100 | 01-----    | -----011   | 110101-001  |
| <i>Acarechimys minutus</i>           |  | 1110110100 | 01-----    | -----001   | 110001-001  |
| <i>Platypittamys brachyodon</i>      |  | 1100000??? | ??1201001- | 00-010-001 | 000101-000  |
| <i>Galileomys antelucanus</i>        |  | 1110000??? | ??140100A1 | 0101111101 | 100101-001  |
| <i>Acaremys murinus</i>              |  | 1110010020 | 0114A100A1 | 1111111101 | 110101-001  |
| <i>Caviocricetus lucasi</i>          |  | 1100100020 | 01-----    | -----000   | 0101001201  |
| <i>Plesiacarechimys koenigswaldi</i> |  | 1110110020 | 01-----    | -----001   | 0000001B0A  |
| <i>Stichomys regularis</i>           |  | 1111111100 | 01-----    | -----011   | 0-0011-001  |
| <i>Sallamys pascuali</i>             |  | ?110010??? | ??110100A2 | 010?10-001 | 010100AD00  |
| <i>Adelphomys candidus</i>           |  | 1111111??0 | 00-----    | -----011   | 2-0010120A  |
| <i>Deseadomys arambourgi</i>         |  | ?110011??? | ??110?001- | 1100110001 | 0-0001-000  |
| <i>Eumysops laeviplicatus</i>        |  | 1121111010 | 01-----    | -----001   | 2-0000AB0A  |
| <i>Neophanomys biplicatus</i>        |  | 1121111??? | ??-----    | -----1??   | ??????????  |
| <i>Echimys chrysurus</i>             |  | 1111111100 | 01-----    | -----001   | 2-0001-001  |
| <i>Kannabateomys amblyox</i>         |  | 1111111100 | 01-----    | -----011   | 2-0001-00A  |
| <i>Draconomys verai</i>              |  | 1100011??? | ?1???????? | ???????001 | 2101000110  |
| <i>Cachiyacuy contamanensis</i>      |  | 01000?0012 | 2101100202 | 111100-001 | 0100000D0A  |
| <i>Canaanimys maquiensis</i>         |  | ?100??0??? | ?????????? | ???????001 | 0110000320  |
| <i>Chasicomys octodontiforme</i>     |  | 1121111??? | ?1-----    | -----101   | 1-0?0????00 |
| <i>Chasichimys bonaerense</i>        |  | ?121111??? | ??-----    | -----1??   | ?-????????? |
| <i>Octomys mimax</i>                 |  | 113?111??? | ??-----    | -----101   | ?-??0?????1 |
| <i>Octodontomys gliroides</i>        |  | 113?111??? | ??-----    | -----101   | ?-??0?????1 |

|                        |            | 50         | 60         | 70          | 80         | 90 |
|------------------------|------------|------------|------------|-------------|------------|----|
| <i>B. zafarullahi</i>  | 1100100110 | 0?20110000 | 2120111021 | 1111000011  | 1000110110 |    |
| <i>M. schaubi</i>      | 010110-010 | 0?1101001- | 2????????? | ?????000011 | 1000110110 |    |
| <i>P. andrewsi</i>     | 010??00??? | ??01110000 | 210110-021 | 11110001-1  | 1A?0110111 |    |
| <i>G. curunuquem</i>   | 110-20010? | ?????????? | ?1210A0100 | 0100010110  | 11000?1110 |    |
| <i>D. azarae</i>       | 1112011102 | 212??00000 | 2??1111110 | 10010100A0  | 0110111A?0 |    |
| <i>E. homogenidens</i> | 1111000000 | 01?020000A | 2111011120 | 1101010010  | 0110111110 |    |
| <i>S. detentus</i>     | 1111000000 | 01?1100000 | 21?1011120 | 1101010010  | 0110111110 |    |
| <i>D. ruigomezi</i>    | 11111000?1 | 1?00200100 | 2-----     | ----0A0000  | 1000111111 |    |
| <i>P. priscus</i>      | 111010A000 | 010010A100 | 2-----     | ----010010  | 000A111110 |    |
| <i>P. prior</i>        | 1111100002 | 1?01100000 | 2-----     | ----010010  | 0110111110 |    |
| <i>A. minutus</i>      | 1A11000A01 | 100110010A | 2-----     | ----010130  | 1100111A00 |    |
| <i>P. brachyodon</i>   | 1112000000 | 10???????? | ?00110-0?0 | 10110A0010  | 100011101A |    |

|                          |             |             |            |             |             |
|--------------------------|-------------|-------------|------------|-------------|-------------|
| <i>G. antelucanus</i>    | 1111000?00  | 0?????????  | ?10010-0?0 | 1111010A00  | 1000111001  |
| <i>A. murinus</i>        | 1111000001  | 1001?01-00  | 2100A0-0?0 | 1112A10000  | 1100111A11  |
| <i>C. lucasi</i>         | 111110000C  | 2?01A10001  | 2-----     | ----0001-0  | 1000100101  |
| <i>P. koenigswaldi</i>   | 1110200001  | 100110000A  | 2-----     | ----010A10  | 1100111000  |
| <i>S. regularis</i>      | 1112010A0C  | C10110001-  | 2-----     | ----0BA1?0  | 0001111111  |
| <i>S. pascuali</i>       | 1102000001  | 1??0210000  | 110010-120 | 0101011--0  | 1100111001  |
| <i>A. candidus</i>       | 1112110002  | 2?0120???-  | 2-----     | ----?1A1?0  | 00?11?1111  |
| <i>D. arambourgi</i>     | 1112100000  | 2?????????  | ?00010-1?? | 1111010A00  | 1100111111  |
| <i>E. laeviplicatus</i>  | 1112200A01  | 10?1?0001-  | 2-----     | ----011--0  | 1100111??1  |
| <i>N. biplicatus</i>     | ??????????? | ???11000??  | 2-----     | ----11A1-0  | 1100111??1  |
| <i>E. chrysurus</i>      | 10-1010002  | 2001100000  | 0-----     | ----011--0  | 1001101111  |
| <i>K. amblyox</i>        | 0101011100  | 010110001-  | 2-----     | ----011--0  | 1101111111  |
| <i>D. verai</i>          | 1112?00?21  | 1?????????  | ?10110-120 | 1111010030  | 0100111110  |
| <i>C. contamanensis</i>  | A101100011  | 1?01200000  | 110?10-110 | 0112010021  | 0100111A00  |
| <i>C. maquiensis</i>     | A100000001  | 1?2??????00 | 2????????? | ???010120   | 0100111100  |
| <i>C. octodontiforme</i> | ?1??100???  | ??????????? | ?-----     | ----111--0  | 1?00111???  |
| <i>C. bonaerense</i>     | ??????????? | ?????0????? | 2-----     | ----111--0  | 11001111?1  |
| <i>O. mimax</i>          | ?10?110102  | 20????0???? | 2-----     | ----21????? | 0??0??????? |
| <i>O. gliroides</i>      | ?1??010102  | 20????0???? | 2-----     | ----22????? | 0??0??????? |

|                          | 100         | 106     |
|--------------------------|-------------|---------|
| <i>B. zafarullahi</i>    | 10?0??011?  | 0?????  |
| <i>M. schaubi</i>        | 0010?20100  | 010???  |
| <i>P. andrewsi</i>       | 0000000110  | 01????  |
| <i>G. curunuquem</i>     | 01100?0110  | 0000?1  |
| <i>D. azarae</i>         | 0010000010  | 0000?1  |
| <i>E. homogenidens</i>   | 0?10?00100  | 0100??  |
| <i>S. detentus</i>       | 0012000100  | 0100?1  |
| <i>D. ruigomezi</i>      | 0111020111  | 0100?1  |
| <i>P. priscus</i>        | 11110?011A  | 0100?0  |
| <i>P. prior</i>          | 010102A111  | 0000?1  |
| <i>A. minutus</i>        | 0101020200  | 0B0101  |
| <i>P. brachyodon</i>     | 0100020010  | 0?0???  |
| <i>G. antelucanus</i>    | 0?010?0110  | 020100  |
| <i>A. murinus</i>        | 01010?0110  | 020111  |
| <i>C. lucasi</i>         | 0101011?11  | 0100?1  |
| <i>P. koenigswaldi</i>   | 0101011?01  | 01?10?  |
| <i>S. regularis</i>      | 1100220101  | 0000?0  |
| <i>S. pascuali</i>       | 011001011?  | 01????  |
| <i>A. candidus</i>       | 1?12021?01  | 00?0??  |
| <i>D. arambourgi</i>     | 01111?0100  | 0?????  |
| <i>E. laeviplicatus</i>  | 01?1021?10  | 0100?0  |
| <i>N. biplicatus</i>     | 0101021?10  | 01????  |
| <i>E. chrysurus</i>      | 211122A111  | 0110?0  |
| <i>K. amblyox</i>        | 2100021?11  | 0110?0  |
| <i>D. verai</i>          | 0110??010?  | ??????? |
| <i>C. contamanensis</i>  | 00????????? | ??????? |
| <i>C. maquiensis</i>     | 01????????? | ??????? |
| <i>C. octodontiforme</i> | 01120?????  | ?1????? |
| <i>C. bonaerense</i>     | 0?120?1?11  | 01????? |
| <i>O. mimax</i>          | 1111021?10  | 110111  |
| <i>O. gliroides</i>      | 1110021?10  | 111111  |
