# Supplementary material
Source: publisher figshare collection journal article supplement (https://tandf.figshare.com/articles/dataset/_/963515)
Supplement: Supplementary file 3 [file 1]

Journal of Vertebrate Paleontology  
ONLINE SUPPLEMENTARY INFORMATION

A new early Miocene octodontoid rodent (Hystricognathi, Caviomorpha) from Patagonia  
(Argentina) and a reassessment of the early evolution of Octodontoidea

MICHELLE ARNAL,<sup>\*,1</sup> ALEJANDRO G. KRAMARZ,<sup>2</sup> M. GUIOMAR VUCETICH,<sup>1</sup> and E.  
CAROLINA VIEYTES<sup>3</sup>

<sup>1</sup>Departamento Paleontología de Vertebrados, Facultad de Ciencias Naturales y Museo, Paseo  
del Bosque s/n, 1900 La Plata, Argentina, [michoarnal@fcnym.unlp.edu.ar](mailto:michoarnal@fcnym.unlp.edu.ar);  
[vucetich@fcnym.unlp.edu.ar](mailto:vucetich@fcnym.unlp.edu.ar);

<sup>2</sup>Sección Paleontología de Vertebrados, Museo Argentino de Ciencias Naturales “Bernardino  
Rivadavia,” Av. Ángel Gallardo 470, C1405DJR Buenos Aires, Argentina,  
[agkramarz@macn.gov.ar](mailto:agkramarz@macn.gov.ar);

<sup>3</sup>Sección Mastozoología, División Zoología de Vertebrados, Facultad de Ciencias Naturales y  
Museo, Paseo del Bosque s/n, 1900 La Plata, Argentina, [cvieytes@fcnym.unlp.edu.ar](mailto:cvieytes@fcnym.unlp.edu.ar)

APPENDIX 4. List of taxa used in the phylogenetic analysis. Literature used for scoring within parenthesis.

*Bugtimys zafarullahi*: (Marivaux et al., 2001)

*Metaphiomys schaubi*: AMNH 13273, YPM PU 18223, YPM PU 21298, YPM PU 21307

*Phiomys andrewsi*: AMNH 13275, YPM PU 18064 (personal observation and Holroyd, 1994)

*Garridomys curunuquem*: MOZ-PV-920, MOZ-PV-856, MOZ-PV-857, MOZ-PV-858, MOZ-PV-922, MOZ-PV-923, MOZ-PV-929, MOZ-PV-930

*Dasyprocta azarae*: MACN Ma 47.345, MACN Ma 51.70, MACN Ma 51.172

*Eosteiomys homogenidens*: MACN A 52-165, MACN A 52-166, MACN A 52-169

*Steiromys detentus*: MACN A 5, MACN A 6, MACN A 10, MACN A 4154, 4159, MACN A 10046, MACN A 10774

*Prospaniomys priscus*: MACN A 52-131, MACN A 52-132, MACN A 52-133, MACN A 52-135, MACN A 52-140, MACN PV CH1913, MLP 82-V-2-32, MPEF-PV 5039, MPEF-PV 5653, MPEF-PV 5664, MPEF-PV 6447, MPEF-PV 7572

*Protacaremys prior*: AMNH 29740, MACN A 52-112b, MACN A 52-113, MACN A 52-115, MACN A 52-116, MACN A 52-119, MACN A 52-123, MLP 85-VII-3-129, MPEF-PV 6082, MPEF-PV 6747, MPEF-PV 6748, MPEF-PV 6804, MPEF-PV 7468

*Acarechimys minutus*: MACN A 237, MACN A 238, MACN A 4065, MACN A 4070, MACN A 4071, MACN A 4263, MLP 15-410a, MLP 15-410b, YPM PU 15806

*Platypittamys brachyodon*: AMNH 29600, AMNH 29601

*Galileomys antelucanus*: MLP 82-V-2-105, MACN A 52-145, MPEF-PV 5986, MPEF-PV 5988,  
MPEF-PV 5990, MPEF-PV 5993, MPEF-PV 5994, MPEF-PV 5995, MPEF-PV 5998,  
MPEF-PV 6003, MPEF-PV 6008

*Acaremys murinus*: MACN A 249, MACN A 266, MACN A 1899, MACN A 4112, MACN A  
4128, MACN A 4133, MACN A 4246, MLP 15-410, YPM PU 15281

*Caviocricetus lucasi*: MACN PV CH1990, MACN PV CH1991, MACN PV CH1993, MACN  
PV CH1996, MACN PV CH1997, MACN PV CH1998, MPEF-PV 503, MPEF-PV 505,  
MPEF-PV 516, MPEF-PV 518, MPEF-PV 5049, MPEF-PV 5105, MPEF-PV 5113,  
MPEF-PV 1416-9, MPEF-PV 1416-13

*Plesiacarechimys koenigswaldi*: MLP 91-V-1-2, MLP 91-V-1-13, MLP 91-V-1-16, MLP 91-V-  
1-19, MLP 91-V-1-22, MLP 91-V-1-30, MLP 91-V-1-44, MLP 91-V-1-55, MLP 92-V-  
10-1, MLP 92-V-10-15

*Stichomys regularis*: MACN A 239, MACN A 240, MACN A 1924, MACN A 1971, MACN A  
1972, MACN A 4189

*Sallamys pascuali*: YPM PU 20906, YPM PU 20907, YPM PU 20909

*Adelphomys candidus*: MACN A 241, MACN A 242, MACN A 243, MACN A 246, MACN A  
1921, MACN A 1924, MACN A 1926

*Deseadomys arambourgi*: (Wood and Patterson, 1959; Vucetich and Ribeiro, 2003).

*Eumysops laeviplicatus*: MACN A 1623, MACN A 1626, MACN 7314, MACN PV 7322

*Neophanomys biplicatus*: MACN A 8253, MACN A 8565

*Echimys chrysurus*: MACN Ma 3.28, MACN Ma 31.158, MACN Ma 31.160

*Kannabateomys amblyox*: MACN Ma 49.335, MACN Ma 49.354, MACN Ma 52.49, MACN Ma  
54.83

*Draconomys verai*: MPEF-PV 7506, MPEF-PV 7756, MPEF-PV 7756a, MPEF-PV 7947,  
MPEF-PV 7948, MPEF-PV 7792, MPEF-PV 7946

*Cachiyacuy contaminensis*: (Antoine et al., 2011)

*Canaanimys maquiensis*: (Antoine et al., 2011)

*Chasicomys octodontiforme*: MLP 55-IV-28-1 (personal observation and Pascual, 1967)

*Chasichimys bonaerense*: MLP 55-IV-28-3, MLP 55-IV-28-4, MLP 55-IV-28-99, MLP 60-VI-  
18-108 (personal observation and Pascual, 1967)

*Octomys mimax*: MACN Ma 13764, MACN Ma 13765, MACN Ma 13770, MACN Ma 13773

*Octodontomys gliroides*: MACN Ma 27.94, MACN Ma 30.54, MACN Ma 30.56
