# Supplementary material
Source: publisher figshare collection journal article supplement (https://tandf.figshare.com/articles/dataset/_/963515)
Supplement: Supplementary file 4 [file 1]

Journal of Vertebrate Paleontology  
ONLINE SUPPLEMENTARY INFORMATION

A new early Miocene octodontoid rodent (Hystricognathi, Caviomorpha) from Patagonia  
(Argentina) and a reassessment of the early evolution of Octodontoidea

MICHELLE ARNAL,<sup>\*,1</sup> ALEJANDRO G. KRAMARZ,<sup>2</sup> M. GUIOMAR VUCETICH,<sup>1</sup> and E.  
CAROLINA VIEYTES<sup>3</sup>

<sup>1</sup>Departamento Paleontología de Vertebrados, Facultad de Ciencias Naturales y Museo, Paseo  
del Bosque s/n, 1900 La Plata, Argentina, [michoarnal@fcnym.unlp.edu.ar](mailto:michoarnal@fcnym.unlp.edu.ar);  
[vucetich@fcnym.unlp.edu.ar](mailto:vucetich@fcnym.unlp.edu.ar);

<sup>2</sup>Sección Paleontología de Vertebrados, Museo Argentino de Ciencias Naturales “Bernardino  
Rivadavia,” Av. Ángel Gallardo 470, C1405DJR Buenos Aires, Argentina,  
[agkramarz@macn.gov.ar](mailto:agkramarz@macn.gov.ar);

<sup>3</sup>Sección Mastozoología, División Zoología de Vertebrados, Facultad de Ciencias Naturales y  
Museo, Paseo del Bosque s/n, 1900 La Plata, Argentina, [cvieytes@fcnym.unlp.edu.ar](mailto:cvieytes@fcnym.unlp.edu.ar)

APPENDIX 1. Studied materials of *Dudumus ruigomezi*, gen. et sp. nov.

MACN PV CH 2020, left mandibular fragment with m1–m3; MACN PV CH 2021, right mandibular fragment with m1–m3; MACN PV CH 2022, left mandibular fragment with dp4 and m1; MACN PV CH 2023, left mandibular fragment with m1–m3; MACN PV CH 2024, right mandibular fragment with dp4–m2; MACN PV CH 2025, right mandibular fragment with m1 and m2; MACN PV CH 2026, left mandibular fragment with m1 and m2; MACN PV CH 2027, left mandibular fragment with dp4–m2; MACN PV CH 2028, right dp4 and m1; MACN PV CH 2029, right mandibular fragment with m1; MACN PV CH 2030, right m1 and m2; MACN PV CH 2031, left mandibular fragment with dp4–m2; MACN PV CH 2032, left mandibular fragment with m1; MACN PV CH 2033, right m1 and m2; MACN PV CH 2034, left dp4 and m1; MACN PV CH 2035, right mandibular fragment with dp4; MACN PV CH 2036, right mandibular fragment with m2; MACN PV CH 2037, right mandibular fragment with dp4; MACN PV CH 2038, left mandibular fragment with m1; MACN PV CH 2039, right m1 or m2; MACN PV CH 2040, left mandibular fragment with m1 and m2; MACN PV CH 2041, left mandibular fragment with m2; MACN PV CH 2042, left mandibular fragment with dp4; MACN PV CH 2043, right m1 and m2; MACN PV CH 2044, right mandibular fragment with m2; MACN PV CH 2045, right mandibular fragment with m1 or m2; MACN PV CH 2046, left m1 and m2; MACN PV CH 2047, left m2 and m3; MACN PV CH 2048, left mandibular fragment with m1 or m2; MACN PV CH 2049, right m1 and m2; MACN PV CH 2050, m1 or m2; MACN PV CH 2051, left m2 and m3; MACN PV CH 2052, right dp4 and m1; MACN PV CH 2053, left dp4 and m1; MACN PV CH 2054, left dp4; MACN PV CH 2055, left m1 or m2; MACN PV CH 2056, right m1 or m2; MACN PV CH 2057, left m1 or m2; MACN PV CH 2058, right m1;

MACN PV CH 2059, right m1 and m2; MACN PV CH 2060, left m1 or m2; MACN PV CH 2061, right m1 and m2; MACN PV CH 2062, right m1 and m2; MACN PV CH 2063, right m1 and m2; MACN PV CH 2064, left m3; MACN PV CH 2065, left dp4; MACN PV CH 2066, left m3; MACN PV CH 2067, right m1 or m2; MACN PV CH 2068, left m1 or m2; MACN PV CH 2069, left m1 or m2; MACN PV CH 2070, left m1 or m2; MACN PV CH 2071, left m1 or m2; MACN PV CH 2072, left dp4; MACN PV CH 2073, right m3; MACN PV CH 2074, left m1 or m2; MACN PV CH 2075, right m1 or m2; MACN PV CH 2076, right maxillary fragment with DP4 and M1; MACN PV CH 2077, left maxillary fragment with DP4 and M1; MACN PV CH 2078, left maxillary fragment with DP4 and M1; MACN PV CH 2079, left maxillary fragment with DP4 and M1; MACN PV CH 2080, right maxillary fragment with DP4 and M1; MACN PV CH 2081, left maxillary fragment with DP4 and M1; MACN PV CH 2082, right maxillary fragment with DP4 and M1; MACN PV CH 2083, right DP4 and M1; MACN PV CH 2084, right DP4 and M1; MACN PV CH 2085, right maxillary fragment with DP4 and M1; MACN PV CH 2086, right maxillary fragment with DP4 and M1; MACN PV CH 2087, right maxillary fragment with DP4 and M1; MACN PV CH 2088, right maxillary fragment with DP4 and M1; MACN PV CH 2089, right M1 and M2; MACN PV CH 2090, right DP4 and M1; MACN PV CH 2091, right maxillary fragment with DP4 and M1; MACN PV CH 2092, right maxillary fragment with DP4 and M1; MACN PV CH 2093, left maxillary fragment with DP4; MACN PV CH 2094, right maxillary fragment with DP4; MACN PV CH 2095, left maxillary fragment with DP4; MACN PV CH 2096, left maxillary fragment with DP4; MACN PV CH 2097, right maxillary fragment with DP4; MACN PV CH 2098, left maxillary fragment with M1; MACN PV CH 2099, left maxillary fragment with DP4–m1; MACN PV CH 2100, left maxillary fragment with DP4; MACN PV CH 2101, right maxillary fragment with M1; MACN PV CH

2102, left maxillary fragment with DP4; MACN PV CH 2103, left maxillary fragment with DP4; MACN PV CH 2104, right DP4; MACN PV CH 2105, left DP4; MACN PV CH 2106, left maxillary fragment with DP4; MACN PV CH 2107, right maxillary fragment with DP4; MACN PV CH 2108, left M1 and M2; MACN PV CH 2109, right maxillary fragment with DP4; MACN PV CH 2110, left maxillary fragment with P4; MACN PV CH 2111, left dp4; MACN PV CH 2112, left dp4; MACN PV CH 2113, left upper molar; MACN PV CH 2114, left upper molar; MACN PV CH 2115, upper molar; MACN PV CH 2116, right upper molar; MACN PV CH 2117, right upper molar; MACN PV CH 2118, right upper molar; MACN PV CH 2119, right M3; MACN PV CH 2120, left upper molar; MACN PV CH 2121, right upper molar; MACN PV CH 2122, right M1 or M2; MACN PV CH 2123, left upper molar; MACN PV CH 2124, right upper molar; MACN PV CH 2125, right upper molar; MACN PV CH 2126, left upper molar; MACN PV CH 2127, right upper molar; MACN PV CH 2128, right DP4; MACN PV CH 2129, left upper molar; MACN PV CH 2130, right upper molar; MACN PV CH 2131, right upper molar; MACN PV CH 2132, right upper molar; MACN PV CH 2133, right M3.
